# Supplementary material for: Time-Dependent Effect Of Anthracycline-Based Chemotherapy On Central Arterial Stiffness: A Systematic Review And Meta-Analysis
Source: Research Square preprint supplement (doi:10.21203/rs.3.rs-576333/v1), 2021-06-21
Supplement: Supplementary file 1 [file c09c7137debd6328f271f79d.docx]

**eAppendix (all searches run 24.07.2019; Update 21.01.2020, 2nd Update 18.02.2021)**

**July 24, 2019 January 21, 2020 February 18, 2021**

| Databases | Before deduplica-tion | After deduplica-tion | Before deduplica-tion | After deduplica-tion | Before deduplica-tion | After deduplica-tion |
| --- | --- | --- | --- | --- | --- | --- |
| Medline Ovid | 658 | 658 | 678 | 677 | 703 | 703 |
| Embase Ovid | 1115 | 879 | 1158 | 920 | 1282 | 1019 |
| Cochrane Library | 26 | 24 | 28 | 27 | 30 | 27 |
| Web-of-Science | 79 | 23 | 84 | 25 | 94 | 25 |
| Google Scholar | *100 | 82 | *100 | 82 | *200 | 188 |
| ClinicalTrials.gov | 9 | 9 | 9 | 8 | 9 | 8 |
| WHO ICTRP | 21 | 21 | 72 | 72 | 59 | 59 |
| **Total** | **2008** | **1696** | **2129** | **1811** | **2377** | **2029** |

*in the meantime, the standard for Google Scholar retrieval is 200. Duplicates removed: 348

**Total Number of new results to screen after 2nd update: 392**

3 blocks:
1) Neoplasms AND 2) Anthracyclines AND 3) Vascular Stiffness

Filters: no animal studies, no case reports/editorials/letters/conference abstracts etc.

**Ovid MEDLINE**(R) and Epub Ahead of Print, In-Process & Other Non-Indexed Citations, Daily and Versions(R) <1946 to February 17, 2021>

**703 results**

((exp Neoplasms/ or (cancer* or neoplasm* or carcinom* or carcinogen* or malignan* or tumo?r* or leukemi* or leukaemia* or AML or ALL or lymphom* or sarcom* or (multiple adj2 myelom*)).ti,ab,kw.) and (exp Anthracyclines/ or exp Antineoplastic agents/ or exp cardiotoxicity/ or (Anthracyclines or Anth-bC or Aclarubicin or Daunorubicin or Carubicin or Doxorubicin or Epirubicin or Idarubicin or Nogalamycin or Menogaril or Plicamycin or cardiotoxic* agent* or cardiotoxicit* or cardiac toxicit* or cardiovasc* toxicit* or card*-oncolog*).ti,ab,kw.) and (exp Aorta/ or (aortic adj1 (distens* or stiff* or elastic* or stretch* or compliance)).ti,ab,kw. or (exp Vascular stiffness/ or exp Elasticity or exp Pulse wave analysis/ or (aortic pulse? wave velocit* or aortic PWV or carotid PWV or carotid distensibil* or carotid- femoral pulse? wave velocit* or carotid- femoral PWV or central pulse? wave velocit* or central PWV or cfPWV).ti,ab,kw.) or ((Arterial or artery or vascular) adj3 (stiff* or elastic* or remodel*)).ti,ab,kw.)) not (exp animals/ not humans/) not (letter or news or comment or editorial or congress or case reports).pt

**Ovid Embase** <1974 to 2021 February 17>

**1282 results**

(exp neoplasm/ or (cancer* or neoplasm* or carcinom* or carcinogen* or malignan* or tumo?r* or leukemi* or leukaemia* or AML or ALL or lymphom* or sarcom* or (multiple adj2 myelom*)).ti,ab,kw) AND (exp anthracycline/ or exp antineoplastic agent/ or exp cardiotoxicity/ or (Anthracyclines or Anth-bC or Aclarubicin or Daunorubicin or Carubicin or Doxorubicin or Epirubicin or Idarubicin or Nogalamycin or Menogaril or Plicamycin or cardiotoxic* agent* or cardiotoxicit* or cardiac toxicit* or cardiovasc* toxicit* or card*-oncolog*).ti,ab,kw) AND ((exp aorta/ or (aortic adj1 (distens* or stiff* or elastic* or stretch* or compliance)).ti,ab,kw) or (exp arterial stiffness/ or exp elasticity/ or exp pulse wave/ or (aortic pulse* wave velocit* or aortic PWV or carotid PWV or carotid distensibil* or carotid- femoral pulse* wave velocit* or carotid- femoral PWV or central pulse* wave velocit* or central PWV or cfPWV).ti,ab,kw) or ((Arterial or artery or vascular) adj3 (stiff* or elastic* or remodel*)).ti,ab,kw) not ((exp animal/ or nonhuman/) not exp human/) not (conference abstract or editorial or letter or note).pt not case report/

**Cochrane Database of Systematic Reviews**
Issue 2 of 12, July 2021
**11 Cochrane Reviews**

**Cochrane Central Register of Controlled Trials (CENTRAL)**
Issue 2 of 12, July 2021
**19 Trials**

(cancer* or neoplasm* or carcinom* or carcinogen* or malignan* or tumo*r* or leukemi* or leukaemia* or AML or ALL or lymphom* or sarcom* or (multiple NEAR/2 myelom*)) AND (Anthracyclines or Anth-bC or Aclarubicin or Daunorubicin or Carubicin or Doxorubicin or Epirubicin or Idarubicin or Nogalamycin or Menogaril or Plicamycin or cardiotoxic* agent* or cardiotoxicit* or cardiac toxicit* or cardiovasc* toxicit* or (card* NEXT oncolog*)) AND ((aortic NEAR/1 (distens* or stiff* or elastic* or stretch* or compliance)) OR ((arterial or artery or vascular) NEAR/3 (stiff* or elastic* or remodel*)) OR (aortic NEXT pulse? NEXT wave NEXT velocit*) OR "aortic PWV" OR "carotid PWV" OR (carotid NEXT distensibil*) OR (carotid-femoral NEXT puls? NEXT wave NEXT velocit*) OR (central NEXT pulse? NEXT wave NEXT velocit*) OR "central PWV" OR cfPWV)

**Web of Science** Core Collection

**94 results**

TS=((cancer* or neoplasm* or carcinom* or carcinogen* or malignan* or tumo*r* or leukemi* or leukaemia* or AML or ALL or lymphom* or sarcom* or multiple NEAR/2 myelom*) AND (Anthracyclines or "Antineoplastic Drugs" or Antineoplastics or "Anticancer Agents" or cisplatin* or cytotoxin* or chemotherapy or “anticarcinogenic agent*” or Anth-bC or Aclarubicin or Daunorubicin or Carubicin or Doxorubicin or Epirubicin or Idarubicin or Nogalamycin or Menogaril or Plicamycin or cardiotoxic* NEAR/2 agent* or cardiotoxicit* or cardiac NEAR/2 toxicit* or cardiovasc* NEAR/2 toxicit* or "card* oncolog*") AND ((aortic NEAR/2 (distens* or stiff* or elastic* or stretch* or compliance)) OR ((arterial or artery or vascular) NEAR/2 (stiff* or elastic* or remodel*)) OR "aortic pulse* wave velocity*" OR "aortic PWV" OR "carotid PWV" OR "carotid distensibil*" OR "carotid-femoral pulse* wave velocit*" OR "central pulse* wave velocit*" OR "central PWV" OR cfPWV)) NOT TS=((animal* OR plant* OR rats OR mice OR pigs) NOT (human* OR patient*)) *AND* **DOCUMENT TYPES:** (Article)

**Google scholar** (total: 3820 results)The **first 200 hits** were downloaded for screening (relevance ranking)

anthracycline|"cardiotoxic agents"|cardiotoxicity|"cardiac toxicity"|"cardiovascular toxicity" "aortic|arterial|artery|vascular stiffness|elasticity|stretching|compliance"|pulse wave velocity

***Clinical Trials databases (for ongoing clinical studies)***

**WHO International Clinical Trials Registry Platform** = **59 trials found**
<http://apps.who.int/trialsearch/default.aspx>

anthracycline OR cardiotoxic agents OR cardiotoxicity OR cardiac toxicity OR cardiovascular toxicity

Remark: WHO ICTRP Advanced Search not working since autumn 2020. Basic search allows no nesting, therefore it’s only possible to search with one concept.

**Clinical Trials.gov = 9 studies found**<https://clinicaltrials.gov/>

9 Studies found for: **Cancer OR neoplasm OR carcinoma OR malignant OR tumor OR leukemia OR lymphoma OR sarcoma OR myeloma** (in Condition or disease)**| anthracycline OR cardiotoxic agents OR cardiotoxicity** (in Intervention/treatment) **| ((arterial OR aortic OR vascular) AND (stiffness OR elasticity OR remodelling)) OR pulse wave velocity** (in Outcome Measure)
